# Supplementary material for: Direct phosphorylation of a pyridine-functionalized porous organic polymer for efficient uranium capture
Source: Royal Society of Chemistry journal article supplement (doi:10.1039/d4qi00916a), 2024-01-01
Supplement: d4qi00916a1.pdf [file d4qi00916a1.pdf]

## Supporting Information

### **Direct phosphorylation in pyridine-functionalized porous organic polymer for an efficient uranium capture**

Anni Ye,<sup>a</sup> Lizhen Zhong,<sup>a</sup> Liecheng Guo,<sup>a</sup> Feng Gao,<sup>a</sup> Zhiwu Yu,<sup>\*b</sup> and Feng Luo<sup>a\*</sup>

<sup>a</sup>School of Chemistry and Material Science, East China University of Technology, Nanchang, Jiangxi 344000, China

<sup>b</sup>High Magnetic Field Laboratory Chinese Academy of Sciences Hefei 230031, Anhui, China

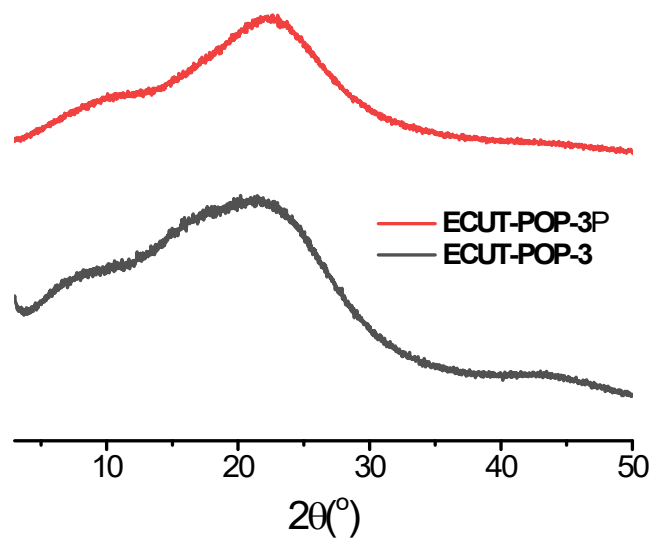

**Fig. S1** PXRD pattern of ECUT-POP-3 and ECUT-POP-3P.

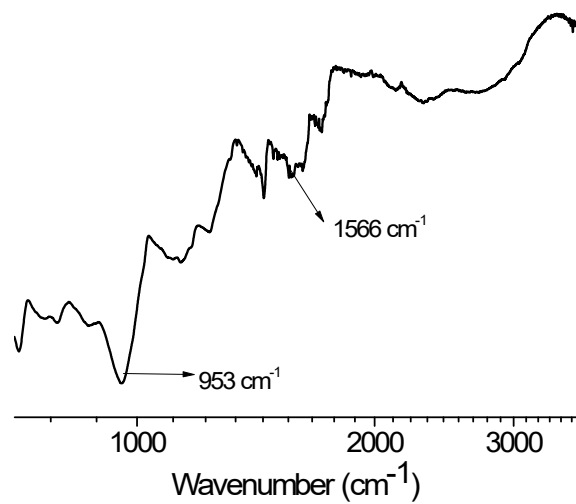

**Fig. S2** IR of ECUT-POP-3P.

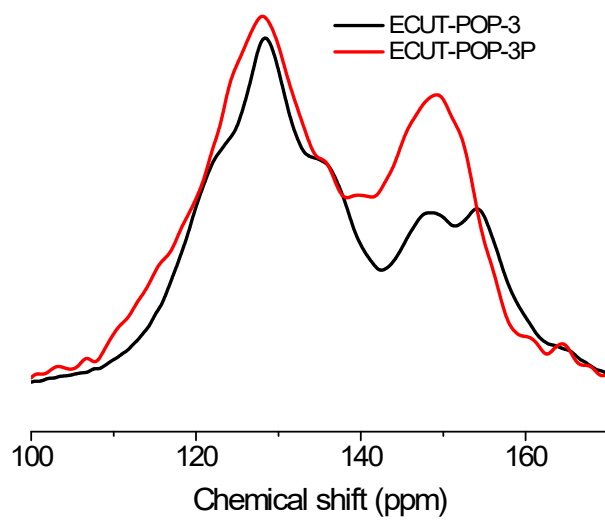

**Fig. S3** The <sup>13</sup>C solid-state nuclear magnetic resonance (NMR) spectrum of ECUT-POP-3 and ECUT-POP-3P.

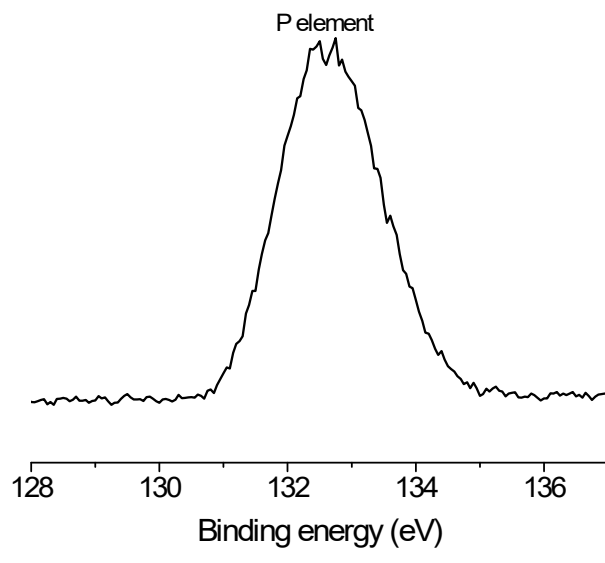

**Fig. S4** XPS of P element in ECUT-POP-3P.

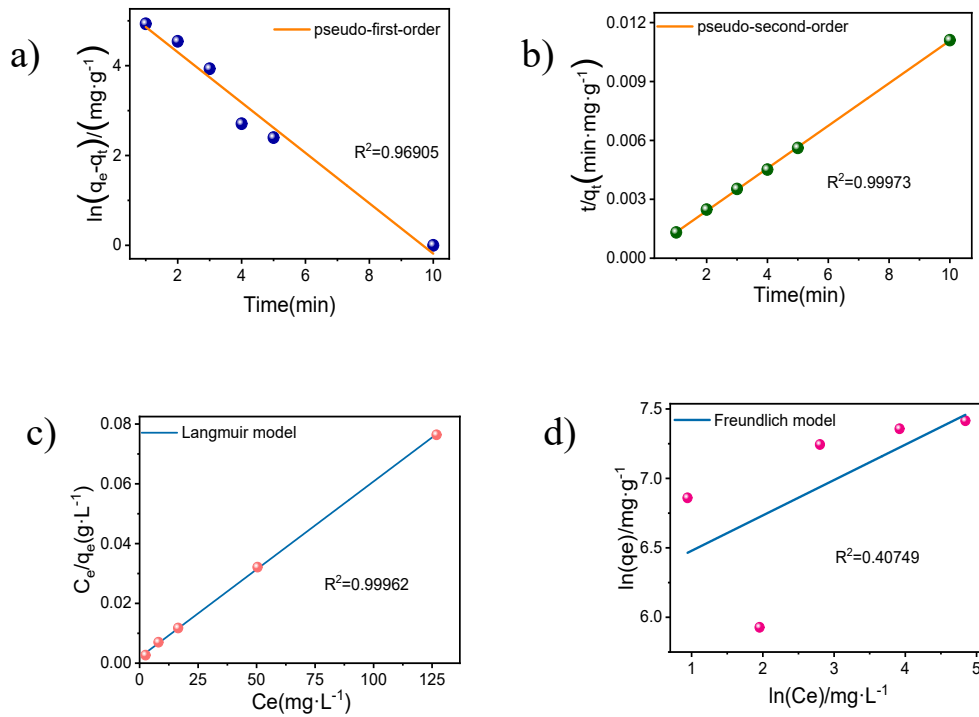

**Fig. S5** a) The fitting by the pseudo-first-order model. b) The fitting by pseudo-second-order model. c) The fitting by Langmuir model. d) The fitting by Freundlich model.

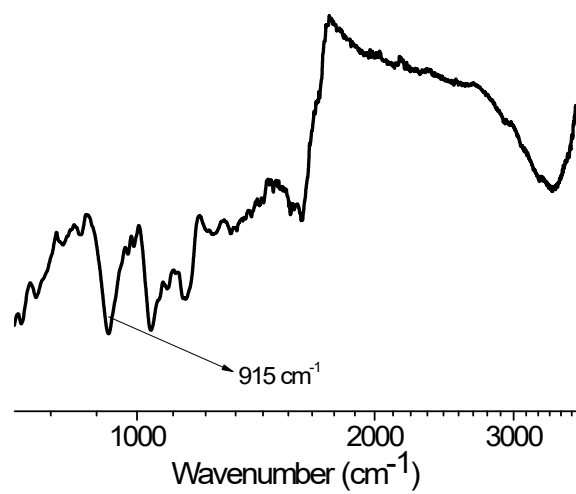

**Fig. S6** IR of U-loaded samples on ECUT-POP-3P.

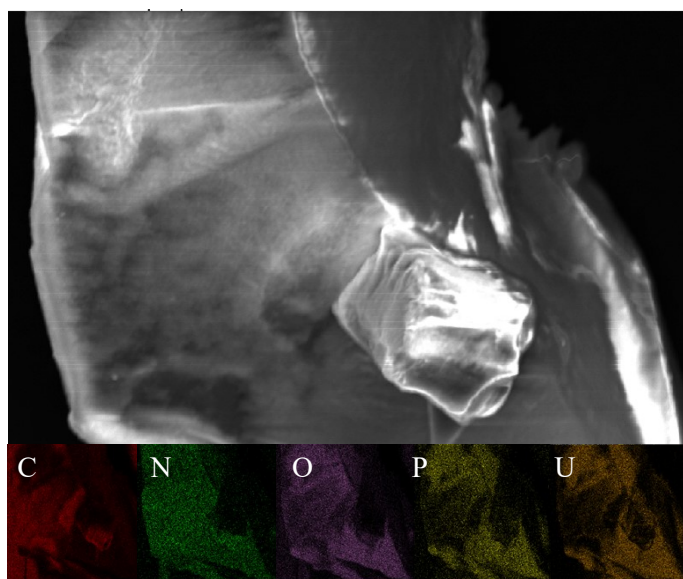

**Fig. S7** The SEM-EDS images of C, N, O, P ,U element in U-loaded samples.



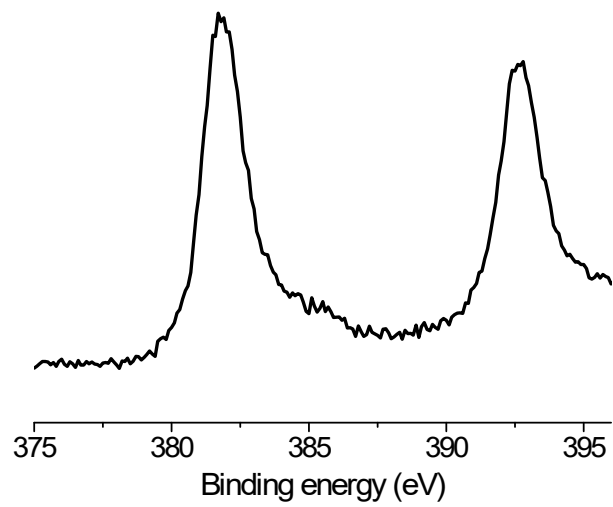

**Fig. S8** XPS of U element in U-loaded samples.

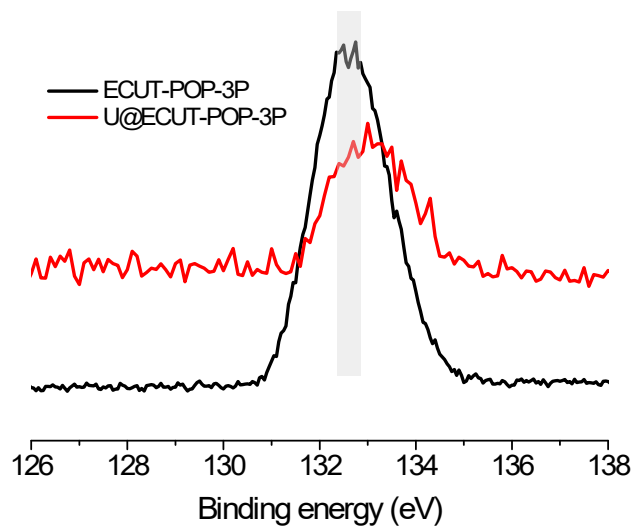

**Fig. S9** XPS of P element in ECUT-POP-3P and the U-loaded samples.

**Table S1.** A comparison in the adsorption kinetics and capacity between established materials and this case.

| <b>Adsorbents</b>                                                   | <b>Adsorption capacity(mg/g)</b> | <b>Adsorption equilibrium time(min)</b> | <b>References</b>                     |
|---------------------------------------------------------------------|----------------------------------|-----------------------------------------|---------------------------------------|
| ECUT-POP-3P                                                         | 1660                             | 4                                       | <b>This work</b>                      |
| TpDBD-Phos                                                          | 633.3                            | 30                                      | Adv. Fun. Mater. 2024, 34, 2313314    |
| ZIF-90-AO                                                           | 324.5                            | 10                                      | J. Hazard. Mater. 2022, 422, 126872   |
| TZDa-Phos                                                           | 394                              | 10                                      | Chem. Eng. J. 2023, 463, 142408       |
| tPE-AO                                                              | 481.3                            | 15                                      | Environ. Sci. Technol. 2023, 57, 9615 |
| LZU-530                                                             | 860                              | 300                                     | J. Am. Chem. Soc. 2024, 146, 4822     |
| [NH <sub>4</sub> ] <sup>+</sup> [COF-SO <sub>3</sub> <sup>-</sup> ] | 851                              | 600                                     | Adv. Sci. 2019, 6, 1900547            |
| iMOF-1A                                                             | 1336.8                           | 120                                     | Small 2024, 20, 2302014               |
